# Supplementary material for: Expression of Taste Receptor 2 Subtypes in Human Testis and Sperm
Source: MDPI journal article supplement (doi:10.3390/jcm9010264), 2020-01-18
Supplement: s1 [file s1]

**Supplementary Table S1.** List of antibodies used in this study.

| Antigen                     | RRID        | Donor species | Dilution |        |
|-----------------------------|-------------|---------------|----------|--------|
|                             |             |               | IF       | WB     |
| <i>Primary antibodies</i>   |             |               |          |        |
| GAPDH                       | AB_10611262 | Goat          | /        | 1:500  |
| $\alpha$ -gustducin         | AB_673678   | Rabbit        | 1:100    | 1:500  |
| $\alpha$ -transducin        | AB_2279097  | Rabbit        | 1:100    | 1:500  |
| TAS2R3                      | AB_2556263  | Rabbit        | 1:100    | 1:500  |
| TAS2R4                      | AB_1049824  | Goat          | 1:100    | 1:500  |
| TAS2R14                     | AB_11009211 | Rabbit        | 1:100    | 1:500  |
| TAS2R19                     | AB_962285   | Rabbit        | 1:300    | 1:1000 |
| TAS2R43                     | AB_2201092  | Rabbit        | 1:300    | 1:1000 |
| <i>Secondary antibodies</i> |             |               |          |        |
| Anti-Rabbit-IgG FITC        | AB_259430   | Rabbit        | 1:500    | 1:100  |
| Anti-Goat-IgG HRP           | AB_92411    | Rabbit        | /        | 1:7500 |
| Anti-Rabbit-IgG HRP         | AB_11212848 | Goat          | /        | 1:2000 |

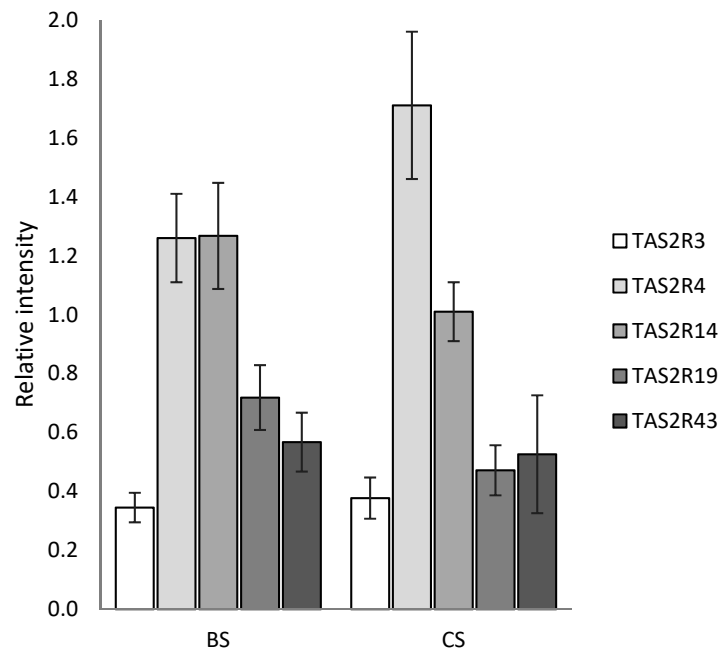

**Supplementary Figure S1.** Computer-assisted semi-quantitative analysis of the overall relative intensity of the bands from western blot of TAS2R3, TAS2R4, TAS2R14, TAS2R19 and TAS2R43 in extracts of human sperm before (BS) and after *in vitro* capacitation (CS). The intensity was measured (pixel/mm<sup>2</sup>) and then normalized relative to GAPDH. Values are expressed as mean  $\pm$  SD.

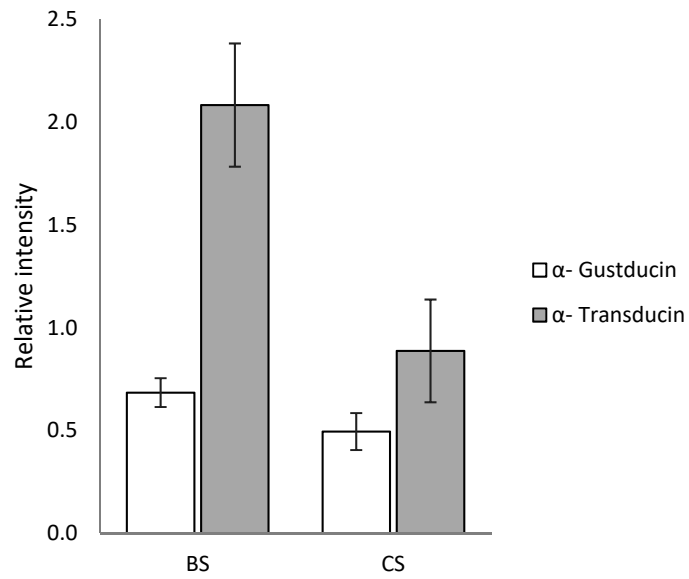

**Supplementary Figure S2.** Computer-assisted semi-quantitative analysis of the overall relative intensity of the bands from western blot of  $\alpha$ -Gustducin and  $\alpha$ -Transducin in extracts of human sperm before (BS) and after *in vitro* capacitation (CS). The intensity was measured (pixel/mm<sup>2</sup>) and then normalized relative to GAPDH. Values are expressed as mean  $\pm$  SD.
